# Supplementary material for: Elaboration of drug nanocarriers based on a glucosamine labeled amphiphilic polymer
Source: Royal Society of Chemistry journal article supplement (doi:10.1039/c3py01730c), 2014-01-01

## Elaboration of drug nanocarrier based on glucosamine labeled amphiphilic polymer

Cédric Boyère<sup>a</sup>, Nicolas Duhem<sup>b</sup>, Antoine Debuigne<sup>a</sup>, Véronique Prétat<sup>b</sup>, Christine Jérôme<sup>\*a</sup>  
and Raphaël Riva<sup>a</sup>

### Supporting Information

Figure S1. <sup>1</sup>H NMR spectra of cholesterol-PEG-OH, and after reaction with trifluoromethyl isocyanate

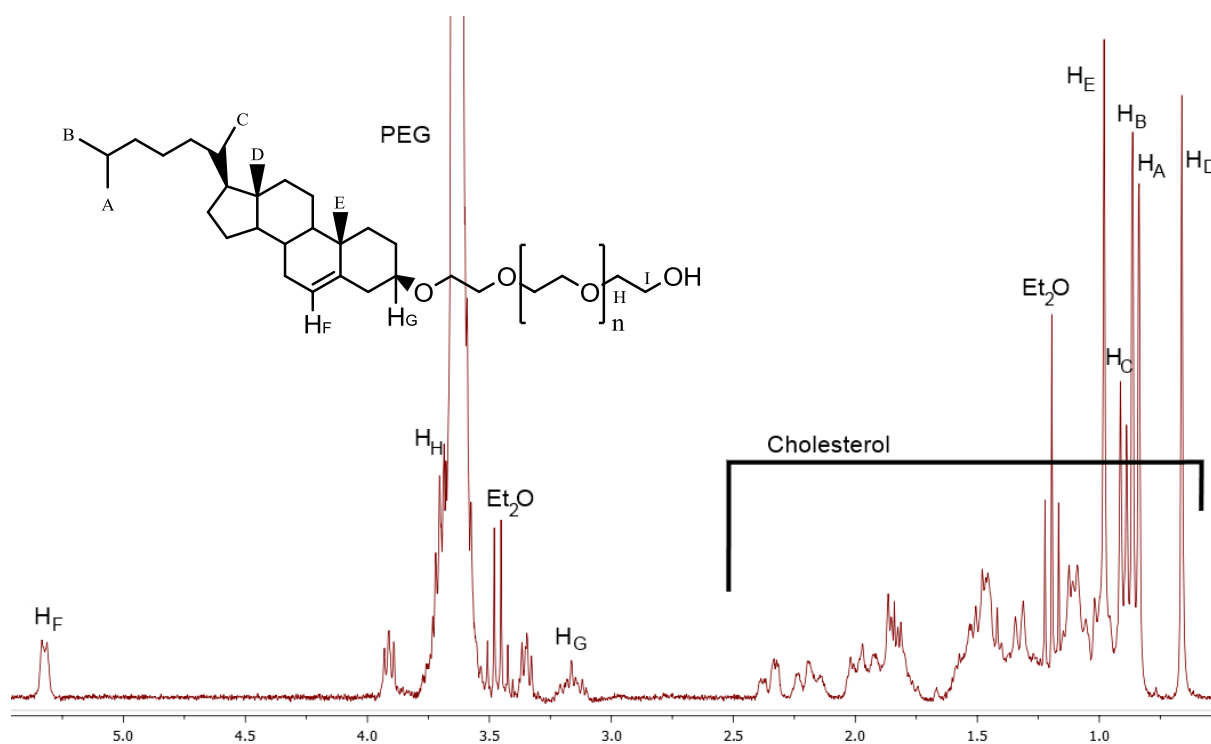

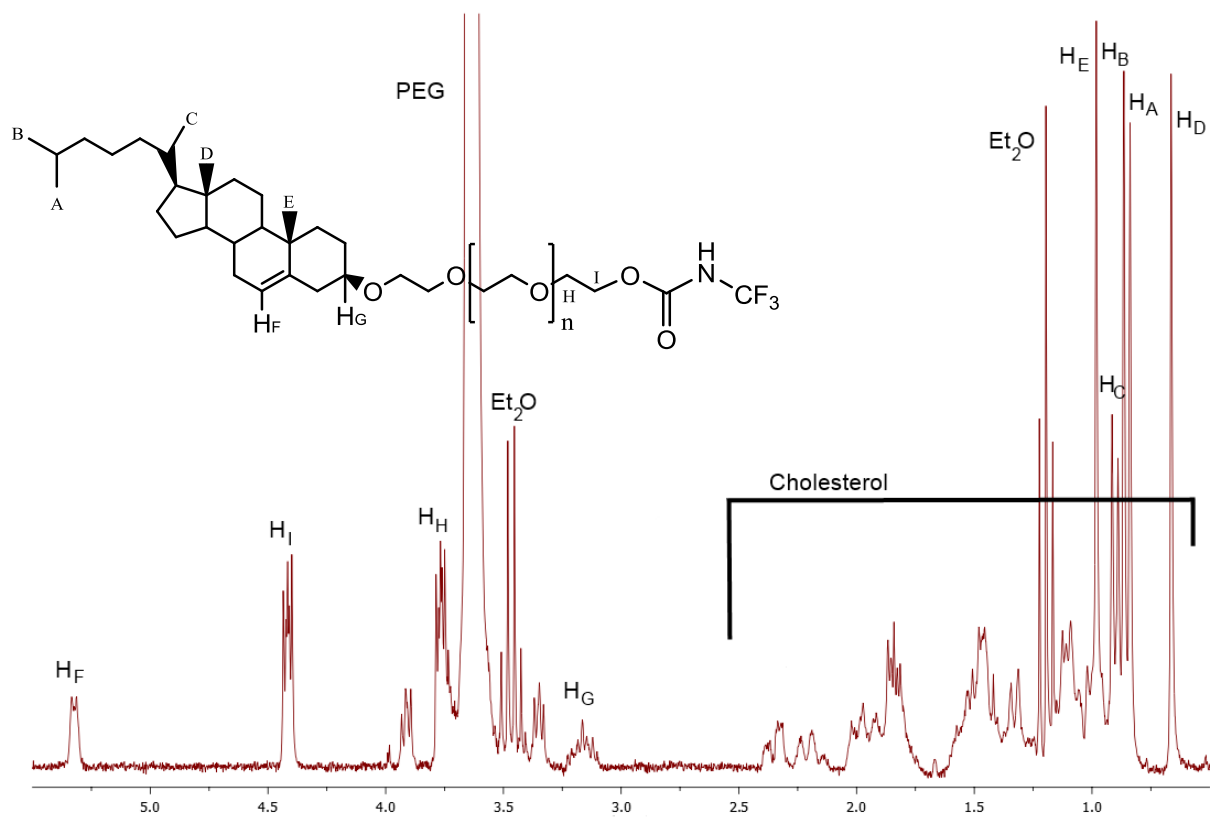

Figure S2. FT-IR spectrum of *N*-(*tert*-butoxycarbonyl)-6-*O*-(3-mercaptopropanoyl)-D-glucosamine

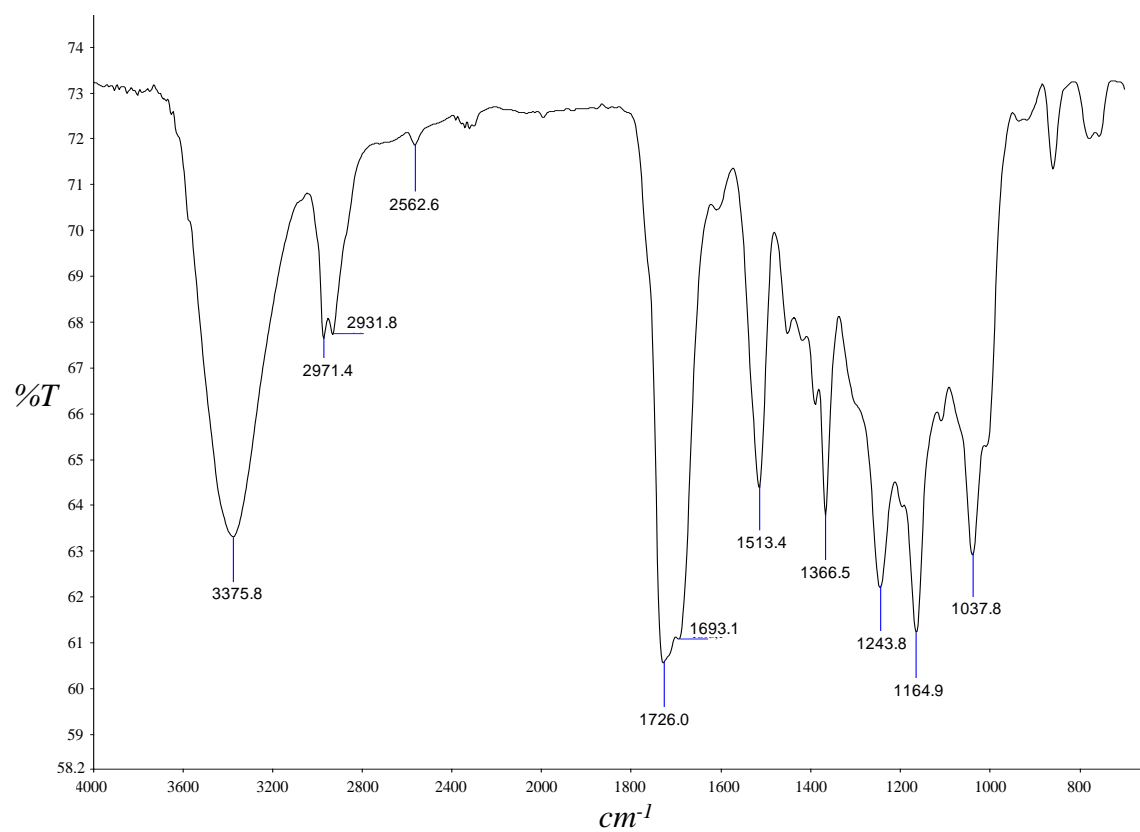

Supplement: c3py01730c.pdf [file c3py01730c.pdf]
